# Supplementary material for: Comprehensive Characterization of the C3HC4 RING Finger Gene Family in Potato (Solanum tuberosum L.): Insights into Their Involvement in Anthocyanin Biosynthesis
Source: Int J Mol Sci. 2024 Feb 8;25(4):2082. doi: 10.3390/ijms25042082 (PMC10889778; doi:10.3390/ijms25042082)
Supplement: Supplementary file 1 [file ijms-25-02082-s001.zip]

Archive with 12 entries (12 files):
- supplementary figures.pdf
- Table S1.xlsx
- Table S10.xlsx
- Table S11.xlsx
- Table S2.xlsx
- Table S3.xlsx
- Table S4.xlsx
- Table S5.xlsx
- Table S6.xlsx
- Table S7.xlsx
- Table S8.xlsx
- Table S9.xlsx
