# Supplementary material for: Comprehensive Characterization of the C3HC4 RING Finger Gene Family in Potato (Solanum tuberosum L.): Insights into Their Involvement in Anthocyanin Biosynthesis
Source: Int J Mol Sci. 2024 Feb 8;25(4):2082. doi: 10.3390/ijms25042082 (PMC10889778; doi:10.3390/ijms25042082)
Supplement: Supplementary file 1 [file ijms-25-02082-s001.zip › Table S1.xlsx]

## Sheet: Table S1
Table S1 Characteristic features of 77 StRING-HCs
No.	Gene ID	chr.	CDS (bp)	MW (Da)	pI	Number of amino acids	Subcellular localization	Subfamily cluster
1	Soltu01G001590	chr01	2652	101064	5.23	883	Nuclear	RING-HC3
2	Soltu01G023560	chr01	2706	100346	6.22	901	Nuclear	RING-HC3
3	Soltu01G027650	chr01	957	35752.1	8.75	318	Nuclear	RING-HC3
4	Soltu01G038400	chr01	876	33691.3	5.55	291	Nuclear	RING-HC2
5	Soltu01G042890	chr01	933	34982.7	5	310	Extracellular	RING-HC2
6	Soltu02G000720	chr02	1068	39177.3	4.94	355	Nuclear	RING-HC2
7	Soltu02G001760	chr02	14298	534771	5.43	4765	Nuclear	RING-HC3
8	Soltu02G008910	chr02	666	23889.9	6.28	221	Plasma Membrane	RING-HC1
9	Soltu02G010660	chr02	804	29743.5	5.35	267	Nuclear	RING-HC1
10	Soltu02G010670	chr02	1362	50543	9.57	453	Nuclear	RING-HC1
11	Soltu02G012240	chr02	1617	61161.8	4.47	538	Nuclear	RING-HC1
12	Soltu02G017340	chr02	1359	50324.7	5.66	452	Nuclear	RING-HC2
13	Soltu02G017730	chr02	696	26192.7	6.29	231	Nuclear	RING-HC1
14	Soltu02G017860	chr02	762	29458.8	7.02	253	Nuclear	RING-HC2
15	Soltu02G020680	chr02	702	25671.3	4.92	233	Nuclear	RING-HC3
16	Soltu02G021990	chr02	1017	38113.5	7.12	338	Nuclear	RING-HC2
17	Soltu02G028060	chr02	528	19803.6	5.64	175	Extracellular	RING-HC3
18	Soltu02G029950	chr02	663	24079.3	6.34	220	Extracellular	RING-HC1
19	Soltu02G033570	chr02	1458	53454.4	5.42	485	Nuclear	RING-HC3
20	Soltu02G033830	chr02	1152	42116.5	9.38	383	Nuclear	RING-HC1
21	Soltu02G034590	chr02	2148	79995.7	8.37	715	Nuclear	RING-HC2
22	Soltu03G000550	chr03	3417	128579	6.61	1138	Nuclear	RING-HC2
23	Soltu03G002260	chr03	3984	145819	5.63	1327	Nuclear	RING-HC2
24	Soltu03G002940	chr03	726	26326.6	5.22	241	Nuclear	RING-HC3
25	Soltu03G013630	chr03	1299	48689.6	5.37	432	Plasma Membrane	RING-HC3
26	Soltu03G025320	chr03	1320	48233.8	5.73	439	Nuclear	RING-HC3
27	Soltu03G029850	chr03	1449	55513.3	6.03	482	Nuclear	RING-HC1
28	Soltu05G002540	chr05	1380	52253.6	6.92	459	Plasma Membrane	RING-HC3
29	Soltu05G010500	chr05	756	28716.1	5.08	251	Extracellular	RING-HC2
30	Soltu05G012820	chr05	2061	76008.6	7.17	686	Nuclear	RING-HC2
31	Soltu05G018370	chr05	2679	100748	7.2	892	Nuclear	RING-HC2
32	Soltu05G024060	chr05	1455	53390.1	8.66	484	Nuclear	RING-HC3
33	Soltu06G000690	chr06	2766	102373	6.39	921	Nuclear	RING-HC3
34	Soltu06G001970	chr06	2118	78374.5	6.59	705	Nuclear	RING-HC2
35	Soltu06G002260	chr06	603	22075.9	4.27	200	Nuclear	RING-HC3
36	Soltu06G002270	chr06	648	23346.3	9.01	215	Nuclear	RING-HC3
37	Soltu06G009790	chr06	1257	45781.9	5.98	418	Nuclear	RING-HC2
38	Soltu06G023120	chr06	1053	39865	9.48	350	Plasma Membrane	RING-HC3
39	Soltu06G034450	chr06	1302	48082	9.19	433	Nuclear	RING-HC1
40	Soltu07G016550	chr07	528	19998.8	5.41	175	Extracellular	RING-HC3
41	Soltu07G017360	chr07	672	25320.2	9.12	223	Nuclear	RING-HC2
42	Soltu07G017450	chr07	1155	43392	7.91	384	Nuclear	RING-HC2
43	Soltu07G017530	chr07	7647	289360	8.52	2548	Nuclear	RING-HC2
44	Soltu07G019810	chr07	705	26039.8	6.96	234	Nuclear	RING-HC1
45	Soltu07G020040	chr07	1536	57556.4	5.33	511	Nuclear	RING-HC2
46	Soltu07G024380	chr07	1485	53636.7	6.71	494	Plasma Membrane	RING-HC1
47	Soltu08G001290	chr08	2172	80063.9	6.27	723	Nuclear	RING-HC3
48	Soltu08G008680	chr08	2997	109999	8.99	998	Nuclear	RING-HC2
49	Soltu08G012290	chr08	2166	81654.5	8.28	721	Nuclear	RING-HC3
50	Soltu09G008070	chr09	1401	52117.9	5.35	466	Plasma Membrane	RING-HC3
51	Soltu09G017280	chr09	744	27214.3	9.37	247	Nuclear	RING-HC3
52	Soltu09G017690	chr09	768	28144.3	4.74	255	Nuclear	RING-HC3
53	Soltu09G020590	chr09	1263	46788.2	5.48	420	Nuclear	RING-HC3
54	Soltu09G020810	chr09	1293	48245.1	9.36	430	Nuclear	RING-HC1
55	Soltu09G022500	chr09	2427	90790.5	6.1	808	Nuclear	RING-HC3
56	Soltu09G022530	chr09	2433	91150	6.37	810	Nuclear	RING-HC3
57	Soltu09G023400	chr09	1002	37915.3	8.95	333	Nuclear	RING-HC2
58	Soltu09G028850	chr09	1329	49341.3	4.92	442	Nuclear	RING-HC2
59	Soltu10G002310	chr10	1407	51158.6	8.18	468	Plasma Membrane	RING-HC1
60	Soltu10G004220	chr10	672	25135.8	7.94	223	Extracellular	RING-HC1
61	Soltu10G004900	chr10	759	29206.3	5.83	252	Nuclear	RING-HC2
62	Soltu10G015680	chr10	660	24427.1	6.01	219	Plasma Membrane	RING-HC1
63	Soltu10G018400	chr10	1434	53093.8	8.82	477	Plasma Membrane	RING-HC3
64	Soltu10G022750	chr10	726	28006.3	7.95	241	Nuclear	RING-HC2
65	Soltu10G026870	chr10	1248	45824.7	5.34	415	Nuclear	RING-HC1
66	Soltu10G029050	chr10	1254	47136.2	5.35	417	Nuclear	RING-HC1
67	Soltu11G001010	chr11	2070	77389.1	5.93	689	Nuclear	RING-HC2
68	Soltu11G010670	chr11	2544	97773.1	6.11	847	Nuclear	RING-HC3
69	Soltu11G021190	chr11	3201	117685	7	1066	Nuclear	RING-HC2
70	Soltu12G009090	chr12	1182	43547.9	7.98	393	Extracellular	RING-HC3
71	Soltu12G016010	chr12	2646	99163	8.38	881	Nuclear	RING-HC2
72	Soltu12G023350	chr12	1641	62001.7	7.17	546	Nuclear	RING-HC2
73	Soltu12G028090	chr12	696	26140.8	5.96	231	Nuclear	RING-HC1
74	Soltu12G028180	chr12	330	12413.2	5.45	109	Extracellular	RING-HC1
75	Soltu12G028210	chr12	708	26613.5	7.51	235	Nuclear	RING-HC1
76	Soltu12G028260	chr12	708	26620.3	7.1	235	Nuclear	RING-HC1
77	Soltu12G029640	chr12	753	27983.1	8.8	250	Nuclear	RING-HC1
