# Supplementary material for: Comprehensive Characterization of the C3HC4 RING Finger Gene Family in Potato (Solanum tuberosum L.): Insights into Their Involvement in Anthocyanin Biosynthesis
Source: Int J Mol Sci. 2024 Feb 8;25(4):2082. doi: 10.3390/ijms25042082 (PMC10889778; doi:10.3390/ijms25042082)
Supplement: Supplementary file 1 [file ijms-25-02082-s001.zip › Table S2.xlsx]

## Sheet: Sheet1
Table S2 The conserved motifs identified by MEME among StRING-HCs
Pattern	Sequence	Width of motif	Number of distributions	Log likelihood ratio (llr)	E-value
motif1	KDPVVTPCGHLFCRPC	16	68	1800	2.5E-432
motif2	DSRQKKCPVCRAPIS	15	76	1247	3.6e-194
motif3	MSLKAGGVGLNLTVASHVFLMDPWWNPAVEEQAIDRVHRIGQTKPVRIVR	50	8	992	9.4e-193
motif4	AGEFECPICLD	11	75	1055	6.4e-145
motif5	ERDYYDSLYNRSKAQFBQYVQAGTLMNNYAHILELJTRLRQACDHPYL	48	8	811	4e-108
motif6	RRQLSQADKSLNRJSFFLFCCFVTCLLLF	29	9	610	5e-98
motif7	KAIVFSQFTSFLDLJEYPLKKSGINYVRLDGSMSIKARDKAIKEFTEDPE	50	8	814	2.5e-100
motif8	PYEQAISIIGKTLSPFDEDNLIPCFGFGDASTHDQDVFSFYPDERPCNGF	50	4	558	9.8e-84
motif9	WYRVILDEAHTIKNRRSQTSRAALALKASRRWALSGTPIQNNVEDLYSL	49	6	668	6.1e-81
motif10	IVKASQYPLSIILVGVGDGPWDMMKEFDDNIPAREFDNFQFVNFTEIM	48	4	528	2e-76
motif11	QKELQGWSDWANEKVMQAARRLGKDQAELKMLRQEKEDAEKLKKEKQMJE	50	5	608	2.3e-71
motif12	LKVLEADIQHANTLASDFPREYDGACLQMRMSYSPAAHIFLFLVQWTDCH	50	4	524	3.5e-62
motif13	RYKEIVPQLKLAGPTSFAPVIEAAVDIVEQSGGQYHVLLIIADGQVTRS	49	4	514	3.8e-61
motif14	DNYKSLDZVTEALREAGLESSNLIVGIDFTKSNEWTGKRSFNRKSLHHIG	50	4	513	3.7e-56
motif15	AGALGLLRILIYKVYVDGTTTMSVHERKASIREFYAVIYPSLLQLERGVT	50	4	510	5.6e-54
motif16	IFEDLPSLVEYTLLEMICVLREVKPALPVVEAMWCLLILDLNLIHACTME	50	5	592	1.1e-64
motif17	QKTLIPLYGRGQASKESESK	20	14	516	2.3e-53
motif18	QLLELLLQNLSTIFQSAVKRIVKCGYSEEIAERVILRSGLYHGSKDVVS	49	5	560	2.8e-50
motif19	FGGTPTTSLLSPGVGVFGEMVYARMFGNS	29	9	500	1e-41
motif20	DKGDQNSKPTVKGFRSSSILNRIQLDDFQTSTKIDALREEI	41	4	416	1.4e-39
