# Supplementary material for: Comprehensive Characterization of the C3HC4 RING Finger Gene Family in Potato (Solanum tuberosum L.): Insights into Their Involvement in Anthocyanin Biosynthesis
Source: Int J Mol Sci. 2024 Feb 8;25(4):2082. doi: 10.3390/ijms25042082 (PMC10889778; doi:10.3390/ijms25042082)
Supplement: Supplementary file 1 [file ijms-25-02082-s001.zip › Table S3.xlsx]

## Sheet: tandem and segmental
Table S3 Ka/Ks ratios of tandemly and segmentally duplicated StRING-HCs
Gene ID	Gene ID	Ka	Ks	Ka/Ks	Duplication type
Soltu02G010660	Soltu02G010670	0.0742325	0.224197	0.331104	tandem
Soltu07G019810	Soltu10G004220	0.252371	0.964583	0.261638	segmental
Soltu02G017730	Soltu07G019810	0.483187	0.605653	0.797765	segmental
Soltu02G017340	Soltu07G020040	0.496815	2.03062	0.244662	segmental
Soltu07G024380	Soltu10G002310	0.226515	0.758192	0.298757	segmental
Soltu10G002310	Soltu12G029640	0.227517	0.632054	0.359964	segmental
Soltu07G024380	Soltu12G029640	0.205115	0.567831	0.361226	segmental
Soltu02G020680	Soltu07G016550	0.394519	2.12258	0.185867	segmental
Soltu02G020680	Soltu03G002940	0.246262	0.766171	0.321419	segmental
Soltu02G008910	Soltu02G029950	0.102864	0.70211	0.146506	segmental
Soltu02G010660	Soltu02G033830	0.187348	0.837406	0.223725	segmental
Soltu06G000690	Soltu09G022500	0.301588	0.626816	0.481143	segmental
Soltu01G023560	Soltu09G022500	0.609608	2.98576	0.204172	segmental
