# Supplementary material for: Comprehensive Characterization of the C3HC4 RING Finger Gene Family in Potato (Solanum tuberosum L.): Insights into Their Involvement in Anthocyanin Biosynthesis
Source: Int J Mol Sci. 2024 Feb 8;25(4):2082. doi: 10.3390/ijms25042082 (PMC10889778; doi:10.3390/ijms25042082)
Supplement: Supplementary file 1 [file ijms-25-02082-s001.zip › Table S4.xlsx]

## Sheet: potato and Arabidopsis
Table S4 Ka/Ks ratios of the syntenic relationships between potato and Arabidopsis, tomato, cabbage, rice, maize
Gene ID	Gene ID	Ka	Ks	Ka/Ks
Soltu01G001590	AT1G55250	0.314004	1.88943	0.16619
Soltu01G023560	AT1G03365	0.549056	2.5792	0.212878
Soltu01G027650	AT3G08505	0.235597	3.85088	0.06118
Soltu01G038400	AT3G05250	0.382781	2.11088	0.181337
Soltu02G001760	AT5G23110	0.302528	1.80692	0.167428
Soltu02G008910	AT2G23780	0.346968	1.84058	0.18851
Soltu02G012240	AT4G19670	0.245549	4.00047	0.06138
Soltu02G017340	AT5G44280	0.462334	3.79162	0.121936
Soltu02G020680	AT1G62370	0.48309	2.05115	0.235521
Soltu02G029950	AT2G23780	0.337885	5.41747	0.0623695
Soltu02G033570	AT1G67800	0.279453	2.30531	0.121222
Soltu02G034590	AT3G26730	0.410594	2.16298	0.189828
Soltu03G000550	AT5G43530	0.297285	2.21371	0.134292
Soltu03G002260	AT1G11100	0.50695	2.66493	0.19023
Soltu03G029850	AT1G18660	0.287451	1.60192	0.179442
Soltu05G002540	AT1G68820	0.202891	1.96723	0.103136
Soltu06G023120	AT1G79810	0.175374	1.40258	0.125036
Soltu07G016550	AT4G22250	0.404496	2.36322	0.171163
Soltu07G019810	AT4G03510	0.503419	2.26247	0.222509
Soltu07G020040	AT5G44280	0.633783	2.19477	0.288769
Soltu08G001290	AT1G32530	0.374516	1.97127	0.189987
Soltu09G008070	AT5G01450	0.524261	1.73889	0.301492
Soltu09G017280	AT3G07200	0.588769	2.77277	0.212339
Soltu09G017690	AT3G25030	0.632495	2.17897	0.290272
Soltu09G020810	AT1G06770	0.317054	1.97243	0.160743
Soltu09G023400	AT1G02860	0.235582	2.83982	0.0829569

## Sheet: potato and tomato
Gene ID	Gene ID	Ka	Ks	Ka/Ks
Soltu01G001590	Solyc01g006040	0.0444609	0.133206	0.333775
Soltu01G023560	Solyc01g080430	0.0138566	0.0737994	0.187761
Soltu01G027650	Solyc01g087030	0.0286148	0.149356	0.191587
Soltu01G038400	Solyc01g098830	0.0211425	0.0405308	0.521639
Soltu01G042890	Solyc01g103980	0.0186212	0.103527	0.179867
Soltu02G001760	Solyc02g014190	0.0171835	0.0711835	0.241397
Soltu02G008910	Solyc02g065540	0.0183309	0.159586	0.114865
Soltu02G010670	Solyc02g067970	0.0508621	0.135037	0.376653
Soltu02G012240	Solyc02g069230	0.0120003	0.0948308	0.126544
Soltu02G017340	Solyc02g077890	0.0318034	0.0903487	0.352008
Soltu02G017730	Solyc02g078320	0.0351284	0.127111	0.27636
Soltu02G017860	Solyc02g078460	0.00513847	0.116236	0.0442071
Soltu02G018920	Solyc02g079400	0.00280636	0.149347	0.018791
Soltu02G020680	Solyc02g081180	0.0338849	0.183571	0.184587
Soltu02G021990	Solyc02g082110	0.00468294	0.067407	0.0694726
Soltu02G028060	Solyc02g092810	0.0242368	0.140896	0.172019
Soltu02G029950	Solyc02g089870	0.0101097	0.140515	0.0719475
Soltu02G033830	Solyc02g093760	0.0152916	0.104117	0.14687
Soltu02G034590	Solyc02g094510	0.0259947	0.0497979	0.522004
Soltu03G000550	Solyc03g005460	0.0165205	0.0846262	0.195217
Soltu03G002260	Solyc03g006570	0.0204716	0.050843	0.402644
Soltu03G013630	Solyc03g095450	0.0184688	0.0441304	0.418505
Soltu03G025320	Solyc03g111870	0.0100673	0.0579175	0.173821
Soltu03G029850	Solyc03g115720	0.0170277	0.0805203	0.211471
Soltu05G002540	Solyc05g009870	0.0191872	0.0697598	0.275047
Soltu05G010500	Solyc05g014250	0.0113111	0.091693	0.123359
Soltu05G012820	Solyc05g023680	0.0224256	0.12725	0.176232
Soltu05G018370	Solyc05g044480	0.0251793	0.0751501	0.335053
Soltu05G024060	Solyc05g053870	0.0233482	0.111182	0.21
Soltu06G000690	Solyc06g008900	0.0309779	0.0604791	0.512207
Soltu06G001970	Solyc06g008210	0.0163747	0.0759282	0.21566
Soltu06G002260	Solyc06g007880	0.049665	0.16776	0.296047
Soltu06G002270	Solyc06g007870	0.053696	0.0668823	0.802843
Soltu06G009790	Solyc06g051230	0.11029	0.170237	0.647863
Soltu06G023120	Solyc06g066570	0.0037855	0.0626669	0.0604066
Soltu06G034450	Solyc06g084040	0.015282	0.0598734	0.255238
Soltu07G016550	Solyc07g049400	0.020466	0.0990721	0.206577
Soltu07G017530	Solyc07g052100	0.0246472	0.0707245	0.348496
Soltu07G019810	Solyc07g054080	0.0247249	0.127969	0.19321
Soltu07G020040	Solyc07g053800	0.0280588	0.0813056	0.345103
Soltu07G024380	Solyc07g063200	0.0170462	0.0851115	0.200281
Soltu08G001290	Solyc08g006980	0.0472237	0.0886087	0.532947
Soltu08G008680	Solyc08g023280	0.031971	0.0736592	0.434039
Soltu08G012290	Solyc08g061890	0.0721503	0.0930734	0.775197
Soltu09G008070	Solyc09g005320	0.04159	0.0767033	0.54222
Soltu09G017280	Solyc09g059450	0.182284	0.284378	0.640993
Soltu09G017690	Solyc09g059990	0.0320524	0.128113	0.250188
Soltu09G020590	Solyc09g065870	0.0158025	0.0861934	0.183338
Soltu09G020810	Solyc09g065990	0.0235816	0.0640389	0.368239
Soltu09G022530	Solyc09g074200	0.0890176	0.18666	0.476898
Soltu09G023400	Solyc09g075040	0.0110427	0.0799465	0.138127
Soltu09G028850	Solyc09g091790	0.0319995	0.0701856	0.455927

## Sheet: potato and cabbage
Gene ID	Gene ID	Ka	Ks	Ka/Ks
Soltu01G001590	Bo3g184890	0.316877	2.17065	0.145983
Soltu01G027650	Bo3g061660	0.287928	1.03644	0.277805
Soltu01G038400	Bo5g145540	0.388159	3.00431	0.129201
Soltu02G001760	Bo7g097910	0.297224	1.9622	0.151475
Soltu02G008910	Bo4g151890	0.333661	0.637875	0.523082
Soltu02G010670	Bo2g140620	0.483407	2.57206	0.187945
Soltu02G012240	Bo1g021830	0.264625	3.8008	0.0696235
Soltu02G020680	Bo1g027140	0.404371	3.57163	0.113217
Soltu02G029950	Bo4g151890	0.301231	3.25114	0.0926541
Soltu02G033570	Bo2g011850	0.227589	3.82339	0.0595254
Soltu02G033830	Bo2g140620	0.785027	1.66905	0.470344
Soltu03G000550	Bo7g065510	0.304233	2.41004	0.126236
Soltu03G002260	Bo4g086610	0.469453	2.38422	0.1969
Soltu03G029850	Bo8g104270	0.289625	1.61055	0.17983
Soltu05G002540	Bo6g108280	0.202684	1.65904	0.12217
Soltu05G010500	Bo5g015280	0.466098	2.97371	0.15674
Soltu06G000690	Bo5g003800	0.543858	3.87923	0.140197
Soltu06G002260	Bo7g031560	0.58287	2.34998	0.248032
Soltu07G016550	Bo1g027140	0.491164	2.23687	0.219577
Soltu07G017530	Bo5g005230	0.313127	3.17152	0.0987308
Soltu07G019810	Bo7g112010	0.544048	2.30381	0.236151
Soltu07G020040	Bo5g004050	0.982099	1.06681	0.920598
Soltu07G024380	Bo5g127170	0.403458	3.46873	0.116313
Soltu09G017280	Bo5g141770	0.582229	4.29416	0.135586
Soltu09G017690	Bo7g031560	0.985513	1.04783	0.940527
Soltu09G020810	Bo4g056270	0.296764	1.46208	0.202973
Soltu09G023400	Bo8g117260	0.257644	3.75414	0.0686292

## Sheet: potato and rice
Gene ID	Gene ID	Ka	Ks	Ka/Ks
Soltu02G017860	Os10g35670	0.163337	3.66651	0.0445484
Soltu03G002260	Os08g08220	0.472525	3.22667	0.146444
Soltu03G025320	Os01g68060	0.281127	2.77434	0.101331
Soltu05G010500	Os01g67850	0.328227	3.22294	0.101841
Soltu09G020810	Os03g58390	0.529473	2.4233	0.218492
Soltu09G023400	Os07g47590	0.213119	3.43033	0.0621277

## Sheet: potato and maize
Gene ID	Gene ID	Ka	Ks	Ka/Ks
Soltu02G017860	Zm00001d032550	0.373569	3.15483	0.118412
Soltu02G033570	Zm00001d042437	0.02897	0.193325	0.14985
Soltu03G025320	Zm00001d042437	0.027016	0.0908734	0.297292
Soltu05G010500	Zm00001d042455	0.0192321	0.0913869	0.210447
Soltu07G017530	Zm00001d021607	0.441615	2.88028	0.153324
