# Supplementary material for: Comprehensive Characterization of the C3HC4 RING Finger Gene Family in Potato (Solanum tuberosum L.): Insights into Their Involvement in Anthocyanin Biosynthesis
Source: Int J Mol Sci. 2024 Feb 8;25(4):2082. doi: 10.3390/ijms25042082 (PMC10889778; doi:10.3390/ijms25042082)
Supplement: Supplementary file 1 [file ijms-25-02082-s001.zip › Table S5.xlsx]

## Sheet: Sheet4
			Table S5 Number of cis-acting regulatory elements in the StRING-HCs promoter
	CAG-motif	AE-box	ATC-motif	AT1-motif	GATA-motif	GT1-motif	G-box	TCT-motif	I-box	HD-Zip	CAT-box	MYB	MYC	MBS	TC-rich	ABRE	AuxRR-core	TCA-element
Soltu01G001590	0	1	0	0	1	1	2	1	0	0	0	5	2	0	2	4	0	2
Soltu01G023560	0	1	0	0	2	4	2	1	0	1	0	14	7	1	0	3	0	1
Soltu01G027650	1	0	0	0	2	1	1	1	0	0	0	2	7	1	1	2	0	0
Soltu01G038400	0	1	0	0	0	1	0	0	1	0	0	3	2	1	1	1	2	0
Soltu01G042890	0	0	0	0	1	3	0	0	0	0	0	8	2	1	0	0	0	0
Soltu02G000720	0	0	1	0	1	0	0	1	0	0	0	12	1	0	1	0	1	1
Soltu02G001760	0	0	0	0	0	0	2	0	1	0	0	0	5	0	0	2	0	0
Soltu02G008910	0	0	0	0	0	0	0	3	0	0	0	2	2	0	0	0	0	0
Soltu02G010660	0	0	1	0	0	0	0	3	0	0	1	4	6	1	1	1	0	0
Soltu02G010670	0	0	0	0	0	0	1	0	0	0	3	14	4	2	1	4	0	1
Soltu02G012240	0	0	0	0	2	2	0	0	1	0	0	3	8	0	1	0	0	3
Soltu02G017340	0	0	0	0	0	0	0	1	0	0	0	0	4	0	0	1	0	0
Soltu02G017730	0	0	0	0	0	0	1	3	0	0	0	1	2	0	0	1	0	0
Soltu02G017860	0	1	0	0	0	0	0	0	0	0	1	4	1	0	1	1	2	2
Soltu02G020680	0	1	0	0	0	1	3	0	0	0	1	7	6	0	0	3	0	0
Soltu02G021990	0	0	0	0	0	2	1	1	0	0	2	4	5	0	1	2	0	0
Soltu02G028060	1	0	0	0	1	2	2	3	0	0	2	7	3	0	1	3	0	0
Soltu02G029950	1	0	0	0	0	1	0	0	0	0	0	3	3	1	0	1	1	0
Soltu02G033570	1	0	0	0	3	0	0	0	0	0	0	6	1	1	0	2	1	0
Soltu02G033830	0	1	0	0	0	0	0	0	0	0	1	0	5	0	0	1	0	1
Soltu02G034590	0	0	0	0	0	0	1	0	0	0	0	6	5	0	0	1	0	1
Soltu03G000550	0	0	0	0	0	2	1	1	0	0	0	7	2	1	0	1	0	0
Soltu03G002260	0	0	0	0	0	3	0	1	0	0	0	5	3	0	1	1	0	1
Soltu03G002940	0	0	0	0	0	2	3	1	0	0	0	6	4	0	2	3	0	0
Soltu03G013630	0	1	0	0	0	0	0	2	0	0	0	5	4	0	0	1	0	0
Soltu03G025320	0	0	0	0	0	0	1	1	0	0	0	2	3	0	0	1	0	0
Soltu03G029850	0	0	0	0	0	1	1	1	0	0	0	5	4	1	0	2	0	0
Soltu05G002540	0	0	0	0	0	1	1	0	0	1	0	0	3	0	1	1	0	0
Soltu05G010500	0	1	0	0	0	0	1	3	0	0	0	2	4	0	1	1	0	0
Soltu05G012820	0	0	0	0	0	2	0	0	0	1	1	4	3	0	1	1	0	1
Soltu05G018370	0	0	0	0	0	1	0	2	0	0	0	4	2	0	1	0	0	1
Soltu05G024060	0	0	0	0	0	2	0	1	0	0	0	3	3	0	2	1	0	0
Soltu06G000690	0	0	0	0	0	1	1	0	0	0	0	12	7	0	1	3	0	0
Soltu06G001970	0	0	0	0	0	1	0	0	1	0	0	0	8	0	1	3	0	0
Soltu06G002260	0	0	0	0	1	0	2	2	0	0	0	4	5	0	1	2	0	0
Soltu06G002270	0	0	0	0	1	1	2	2	0	0	0	4	5	0	1	2	0	0
Soltu06G009790	0	1	0	0	0	2	1	0	0	2	0	3	3	1	0	1	0	1
Soltu06G023120	0	0	0	0	0	1	1	2	1	0	1	7	7	0	1	3	0	0
Soltu06G034450	0	0	0	0	2	0	1	0	0	0	0	3	3	1	0	1	0	1
Soltu07G016550	0	0	0	1	0	1	0	0	0	0	1	5	3	0	0	0	0	0
Soltu07G017360	0	0	0	0	1	1	0	2	0	0	0	10	3	0	2	3	0	0
Soltu07G017450	0	0	0	0	3	0	0	2	0	0	2	12	3	0	3	2	1	0
Soltu07G017530	0	0	0	0	0	1	0	1	0	1	0	2	5	0	0	0	0	1
Soltu07G019810	0	0	0	0	0	1	0	2	0	0	1	4	3	0	1	2	0	0
Soltu07G020040	0	0	0	0	0	0	0	0	0	0	0	3	8	1	0	0	0	1
Soltu07G024380	1	2	0	0	0	1	0	0	0	0	1	3	1	1	0	1	1	0
Soltu08G001290	0	0	0	0	0	1	0	0	0	1	1	6	5	0	1	0	0	0
Soltu08G008680	0	1	0	0	0	0	2	0	0	1	2	4	2	0	0	3	0	0
Soltu08G012290	0	0	0	0	1	0	3	1	0	0	0	5	2	0	0	4	0	1
Soltu09G008070	0	0	0	0	0	2	1	0	0	0	0	10	6	2	1	3	0	1
Soltu09G017280	0	1	0	0	1	0	0	2	0	0	0	15	5	4	0	0	0	1
Soltu09G017690	0	0	0	0	0	2	1	0	0	0	0	6	7	0	1	3	0	1
Soltu09G020590	0	0	0	0	0	2	0	1	0	0	0	8	5	1	0	1	0	0
Soltu09G020810	0	0	0	0	2	0	0	2	0	0	0	4	4	1	1	1	0	0
Soltu09G022500	0	2	0	0	1	0	0	1	1	1	0	8	3	0	1	1	0	1
Soltu09G022530	0	0	0	0	0	0	0	2	1	0	0	5	5	0	2	1	0	1
Soltu09G023400	0	0	0	0	0	0	0	0	0	0	0	0	2	0	0	1	0	0
Soltu09G028850	0	2	0	0	0	0	0	2	0	0	0	6	2	0	0	0	1	1
Soltu10G002310	0	0	0	0	0	1	1	0	0	0	0	13	2	1	2	4	0	0
Soltu10G004220	0	1	0	0	0	0	2	0	0	0	4	3	5	0	0	2	0	0
Soltu10G004900	0	0	0	2	0	2	1	0	0	0	0	6	8	0	0	3	0	0
Soltu10G015680	0	1	0	0	1	1	1	2	0	1	1	6	2	0	2	2	0	0
Soltu10G018400	0	0	0	0	1	0	3	0	0	0	0	1	4	0	0	5	0	0
Soltu10G022750	0	1	0	0	0	0	2	1	0	0	0	3	5	0	2	3	0	0
Soltu10G026870	0	0	0	0	0	1	0	2	0	0	0	5	4	2	1	1	0	0
Soltu10G029050	0	1	0	0	0	3	2	2	0	1	0	3	3	0	1	3	0	0
Soltu11G001010	0	1	0	0	0	3	0	0	0	0	1	3	3	0	3	2	0	0
Soltu11G010670	0	0	0	0	2	1	0	4	1	0	0	3	6	1	0	1	0	0
Soltu11G021190	0	2	0	0	0	0	4	0	0	0	0	1	9	1	0	5	0	0
Soltu12G009090	0	1	0	0	0	1	2	0	0	0	1	4	3	0	0	2	0	0
Soltu12G016010	1	0	0	0	0	0	2	1	0	0	0	1	5	1	0	6	0	0
Soltu12G023350	0	0	0	0	2	2	1	1	0	0	1	6	2	1	1	2	0	0
Soltu12G028090	1	0	0	0	0	2	1	1	0	0	1	9	3	0	0	3	0	0
Soltu12G028180	0	0	0	0	2	2	1	0	0	0	0	8	5	0	2	2	0	0
Soltu12G028210	0	0	0	0	0	3	1	2	0	0	0	5	5	0	1	2	1	1
Soltu12G028260	0	0	0	0	1	1	1	0	0	0	1	6	6	0	1	1	1	2
Soltu12G029640	0	0	0	0	0	2	1	2	0	0	0	10	3	0	0	1	0	0
