# Supplementary material for: Comprehensive Characterization of the C3HC4 RING Finger Gene Family in Potato (Solanum tuberosum L.): Insights into Their Involvement in Anthocyanin Biosynthesis
Source: Int J Mol Sci. 2024 Feb 8;25(4):2082. doi: 10.3390/ijms25042082 (PMC10889778; doi:10.3390/ijms25042082)
Supplement: Supplementary file 1 [file ijms-25-02082-s001.zip › Table S6.xlsx]

## Sheet: Sheet1
Table S6 The FPKM value of StRING-HCs in different tissues
Gene ID	Sepals	Leaves	Roots	Shoots	Tubers	Stolons	Flowers	Petioles	Petals	Stamens	Carpels	Mature fruit	Immature fruit
Soltu01G001590	32.2914	14.008	17.4444	18.1429	21.4183	23.1275	26.9241	18.4319	26.5508	34.9919	26.696	24.8763	41.8696
Soltu01G023560	3.128	1.25183	2.08432	2.67256	0.650709	2.01608	2.66731	0.598336	1.86319	0.989088	1.94336	1.92877	1.95151
Soltu01G027650	1.68036	0.865244	1.92032	4.26803	1.38295	5.06905	1.9065	5.59069	3.38671	0.693768	2.32823	6.60671	10.6725
Soltu01G038400	82.0215	122.365	25.0758	76.524	1.72949	2.13196	45.4355	26.3339	30.8705	58.6367	15.287	5.49939	10.5079
Soltu01G042890	12.8648	7.94676	13.4019	11.9044	9.11316	6.2145	10.5853	7.78162	11.8979	10.8635	12.4045	12.0908	13.7005
Soltu02G000720	54.9817	9.04883	19.4173	15.7032	26.8047	4.76917	91.9019	24.0463	84.9595	108.894	30.5106	9.83863	13.5373
Soltu02G001760	0.0779929	0	0.736786	2.74731	0	0.0918305	0.480472	0.736008	0	0.441663	0	0.0470863	0.578223
Soltu02G008910	2.51837	0.407259	5.43423	1.45564	0.799375	1.88828	0.297797	0.419953	0	1.10472	2.5791	2.44437	4.26141
Soltu02G010660	5.95742	2.69454	3.35133	3.98719	2.79149	5.29092	2.98923	2.65171	1.69083	0.941669	5.43708	5.23063	4.2496
Soltu02G010670	3.34435	0	4.53677	0	1.22079	3.89152	5.83246	0.61375	44.5789	18.9968	9.361	7.91306	0.928831
Soltu02G012240	20.7639	16.2468	14.5073	14.3148	10.5869	13.6272	18.0848	13.5253	24.8537	10.0517	13.7013	16.1313	19.7308
Soltu02G017340	4.50238	0.266592	3.98495	7.98387	21.5332	2.84246	3.64004	1.17761	1.41643	2.6066	2.78941	25.0607	9.32045
Soltu02G017730	5.54176	5.39885	5.03529	3.3561	5.24175	9.52412	6.57013	6.408	9.3629	2.36366	3.41687	3.31818	7.8047
Soltu02G017860	1.14485	0.230725	0	0	0.537972	0.359295	6.4e-07	1.3299	0.321107	0	4.32e-05	1.22e-09	0
Soltu02G020680	1.50517	0.24127	0.374804	0.0799041	0.319379	0.177537	0	0.271379	0	0.326295	0	0.379038	0.805318
Soltu02G021990	22.5991	8.5885	35.1571	17.4895	54.156	17.2849	23.2573	19.1061	29.4387	52.2708	44.6026	10.4185	11.5605
Soltu02G028060	21.5045	5.22958	12.894	15.4093	18.8671	23.037	14.3349	10.7566	32.3745	12.354	28.0386	29.272	16.687
Soltu02G029950	36.6003	13.7297	51.7233	26.9826	11.6357	20.4305	27.2336	14.3635	26.6513	42.9104	49.7638	79.5264	25.3208
Soltu02G033570	8.68356	23.9126	8.38036	10.9888	1.12958	0.493466	8.03987	6.18821	22.4154	5.86882	7.61884	17.5751	7.54025
Soltu02G033830	57.8282	14.368	39.6876	22.2141	7.19444	13.1236	27.8484	18.739	79.243	40.8643	74.8289	53.8421	38.0568
Soltu02G034590	97.1666	21.3069	114.498	50.4398	45.6374	48.7692	54.7302	47.1037	127.479	89.029	126.24	77.8333	33.4931
Soltu03G000550	17.4842	30.2532	10.3108	12.1786	4.38673	4.77773	17.8518	11.0619	23.0538	3.59305	12.958	2.76303	5.92104
Soltu03G002260	18.6051	5.68928	10.3598	9.22817	16.6766	13.9881	15.31	6.16514	21.678	14.2133	15.5164	17.5758	18.1232
Soltu03G002940	0.167879	0.064495	0.289172	1.40063	0	0.317628	0.506201	0.348494	0.0893358	0.138748	0.61889	0.11603	1.34493
Soltu03G013630	5.78898	8.92769	7.26403	11.656	18.2045	20.7215	1.90397	9.21337	9.16025	3.20926	4.18881	0.928735	9.00405
Soltu03G025320	3.1529	0.0316392	7.9998	2.27291	0.691966	0.51005	0.73235	1.97038	3.0747	0	4.382	0.000897461	0.327715
Soltu03G029850	12.7881	2.26332	12.7017	8.79269	11.1899	6.31935	12.0863	3.29114	8.73041	11.9259	11.2937	18.2135	11.0282
Soltu05G002540	3.32429	0.420362	6.6552	4.72991	1.9459	2.49998	7.04982	2.16815	2.14055	7.85751	1.63773	1.71355	1.73478
Soltu05G010500	182.761	143.575	86.5658	189.074	18.8494	77.1769	244.055	65.7857	183.021	277.758	71.1845	22.7916	39.5898
Soltu05G012820	14.8534	2.0743	16.0441	6.28717	1.97559	13.6235	6.64719	3.27924	10.4595	3.2297	15.9536	12.3712	8.27839
Soltu05G018370	6.95602	2.23967	29.9681	14.8586	3.34097	11.3793	5.30255	6.60724	3.86903	15.1531	5.68244	0.94074	16.8171
Soltu05G024060	5.4074	2.05768	4.37876	3.46977	1.38227	1.28279	3.40388	0.832435	6.46441	1.23681	5.44412	4.92202	1.65655
Soltu06G000690	0	0	0	0	0	0	0	0	0	0	0	3.93919	13.5489
Soltu06G001970	0	0	0.097597	0.0806176	0	0	0.060122	0	0	0	0.102138	0.124277	0.719779
Soltu06G002260	10.3778	0.183276	12.7401	0.185831	1.78735	4.56858	8.58615	0.447667	25.6962	38.5084	15.4226	8.17573	0.567218
Soltu06G002270	7.60603	3.46968	13.3186	5.02818	27.2555	11.5277	4.19709	6.91477	5.11828	1.92489	7.3418	23.3642	8.64989
Soltu06G009790	4.99302	1.30179	3.77914	2.78655	1e-08	0	9.74302	0	0	3.73741	8.11407	9.36832	1.38307
Soltu06G023120	38.6605	24.3953	47.7936	29.7903	22.6452	48.7576	31.3916	22.1438	52.1006	29.5377	41.0972	61.2954	32.5439
Soltu06G034450	0	0.757696	1.62352	0	1.0724	1.208	0.560047	0.501624	0	0.491305	0	1.42397	1.39353
Soltu07G016550	1.31495	1.77103	1.3182	1.2608	0	0.226025	0.280973	0.875274	1.38216	0.362187	1.6424	0.637717	1.34689
Soltu07G017360	5.97162	1.97656	14.8486	21.1494	9.61094	6.55743	10.7349	5.37309	10.4771	2.41797	4.43447	3.35605	16.128
Soltu07G017450	3.79961	1.75926	4.61233	5.38003	4.78875	5.59461	3.30491	2.72822	2.10866	2.72891	6.70541	5.91269	4.8857
Soltu07G017530	19.739	8.65668	27.6348	6.98693	5.86843	9.55381	10.8411	9.552	34.5671	14.8741	15.0468	20.4947	8.337
Soltu07G019810	2.78697	2.99234	10.1284	6.27711	0.17187	2.91198	4.2235	1.44076	3.23217	8.05381	1.70571	0.684894	4.82025
Soltu07G020040	0.777949	3.13935	0.165913	0.36169	0.0057181	11.4914	0.178389	2.42108	13.388	0.337915	5.87173	1.80631	2.29395
Soltu07G024380	35.1827	15.6073	5.36535	12.8064	28.1607	20.4363	17.4532	29.4554	55.5574	26.2639	29.3172	17.3141	22.3264
Soltu08G001290	18.4268	2.5835	5.2991	7.46629	3.3702	6.20905	10.1742	3.38261	20.8816	8.89207	10.8025	7.75216	7.2736
Soltu08G008680	34.0557	5.12802	27.165	16.2857	28.9112	12.3412	17.1569	4.37788	27.018	16.0852	27.5182	34.8997	13.0747
Soltu08G012290	13.8018	4.68461	12.7051	8.63225	7.06406	8.63027	16.7107	4.11261	10.7561	32.7511	15.3847	17.5332	11.9021
Soltu09G008070	45.8762	6.2552	36.5262	29.104	37.8065	11.4469	35.7619	9.71411	9.62061	37.0622	10.2211	37.6252	33.3656
Soltu09G017280	2.28824	0	2.12823	0.610837	0.546181	0.208784	30.3922	0.219779	2.0899	122.133	3.97745	0.422882	1.05054
Soltu09G017690	26.6333	10.4913	24.487	21.5411	15.1043	22.2493	15.5038	19.5411	21.4217	17.1616	33.8782	17.6483	15.2216
Soltu09G020590	28.8845	9.24203	23.8787	17.5203	33.3562	20.7933	31.795	10.5945	26.0675	54.8906	32.9444	39.2309	41.5522
Soltu09G020810	60.3293	22.7833	28.0934	25.7501	15.6268	40.5033	39.0275	40.1743	59.2059	47.2345	55.1235	30.2324	32.2852
Soltu09G022500	3.25026	1.11967	1.54594	4.31051	0.755574	3.01979	1.57072	3.18982	2.25324	0.581826	3.16715	1.73728	4.04446
Soltu09G022530	70.9335	26.5957	44.1923	42.2018	22.4874	29.5052	28.4504	12.6564	61.1596	35.5954	19.8616	91.0325	46.5557
Soltu09G023400	12.3663	10.0077	11.172	10.621	8.24913	17.8426	9.71188	8.71148	8.76942	12.4232	20.8544	12.5662	11.8735
Soltu09G028850	1.06343	0	0.615309	0.408585	0	0.110145	0.146251	0.0478401	0.282616	0.806181	0.357488	0	0.372991
Soltu10G002310	9.29491	1.63279	5.27604	3.8704	5.54786	6.62502	4.62437	3.63076	7.2319	7.98735	8.48037	13.1257	6.86489
Soltu10G004220	85.3605	3.61164	38.9624	159.279	12.9907	44.0478	10.2029	6.6898	61.6837	68.5218	26.6493	2.4834	1.61211
Soltu10G004900	3.17125	1.46386	2.92168	2.28521	1.21477	3.65437	1.17276	1.99471	6.87e-06	1.08117	3.0733	4.04183	4.61111
Soltu10G015680	0.0461143	0	0.0223863	0.0661969	0.0767288	0.0258242	0.0363352	0	0.279187	0	0.383892	0	2.23924
Soltu10G018400	4.12319	0.774511	2.12674	1.23717	0	0.335531	4.08197	0.180992	3.37875	2.90841	5.39135	0.380294	2.16294
Soltu10G022750	6.10995	26.2576	6.73533	4.98276	0	0	20.2897	5.0149	0	18.304	4.69434	5.03843	1.46548
Soltu10G026870	30.1674	11.4256	41.8748	18.8417	24.5692	33.0108	15.6992	21.3403	29.0805	14.2621	23.0213	58.3501	27.3164
Soltu10G029050	40.1901	9.96454	17.073	17.1042	15.7961	20.8173	23.1845	7.44907	18.2575	23.1616	17.4407	23.5594	13.0892
Soltu11G001010	16.605	2.01078	32.6144	5.3175	2.72741	6.63604	2.96334	1.71695	7.29908	8.18768	6.80591	20.4576	5.34807
Soltu11G010670	0.0122916	0.000441511	0.0073121	0.475627	0.374939	0.000596345	4.5067e-06	0.00285195	0.0109892	1.31178	1.64851	0.00054197	0.000647554
Soltu11G021190	0	0	0	0	0	0	18.743	0	0	16.0911	0	0.140083	1.49901
Soltu12G009090	0	0	0	0.307016	0	5.68234	0.329731	0	0.426161	0.447833	0	0.159904	0
Soltu12G016010	43.5997	32.6839	24.3538	41.1832	14.3086	34.5046	23.9097	24.862	47.4131	14.8341	39.5661	10.0873	27.427
Soltu12G023350	1.58892	0.966731	1.2205	1.60657	1.09147	1.05199	1.36079	0.625227	2.01441	0.987978	3.0552	6.82434	6.70149
Soltu12G028090	8.75397	0	3.94688	5.28919	0.606166	0.911675	1.7436	3.51006	0	2.20418	4.81723	3.77092	0
Soltu12G028180	33.9361	0.113155	12.8404	1.53678	0.653182	3.97164	10.2118	1.61136	56.2662	64.4695	14.9715	25.6324	3.14085
Soltu12G028210	198.941	18.3804	169.12	89.5107	83.2563	84.7468	145.262	22.9935	158.982	135.135	168.148	271.953	124.9
Soltu12G028260	5.12502	2.04923	3.30236	4.29915	2.03057	5.25242	3.63815	1.91914	4.49392	4.04321	6.88678	6.88461	5.0516
Soltu12G029640	26.0074	7.74731	26.3807	23.1065	20.2899	18.9681	13.7313	9.89091	19.3793	26.7797	23.6937	23.1852	19.4261
