# Supplementary material for: Comprehensive Characterization of the C3HC4 RING Finger Gene Family in Potato (Solanum tuberosum L.): Insights into Their Involvement in Anthocyanin Biosynthesis
Source: Int J Mol Sci. 2024 Feb 8;25(4):2082. doi: 10.3390/ijms25042082 (PMC10889778; doi:10.3390/ijms25042082)
Supplement: Supplementary file 1 [file ijms-25-02082-s001.zip › Table S7.xlsx]

## Sheet: Sheet1
Table S7 The FPKM value of StRING-HCs under salt, mannitol, and heat stresses
Gene ID	Control (salt; mannitol)	Salt (150 mM NaCl, 24 h)	Mannitol (260 uM, 24 h)	Control (35℃ treatment)	Heat (35℃, 24 h)
Soltu01G001590	4.51395	10.2645	10.9007	13.4401	12.5661
Soltu01G023560	5.02199	9.78	10.7205	17.2021	10.0878
Soltu01G027650	23.2589	55.4507	79.2363	207.249	121.595
Soltu01G038400	1.04302	2.45203	2.36256	1.428	1.58255
Soltu01G042890	17.8943	20.2339	17.1021	59.6008	27.7182
Soltu02G000720	16.5051	20.1488	17.7397	37.9119	23.7053
Soltu02G001760	0.4985	0.0355759	0.0451989	0.000654022	0.00194058
Soltu02G008910	12.0388	15.0912	17.6121	24.8347	28.4979
Soltu02G010660	0.930366	0.993017	0.979107	8.22879	0.337735
Soltu02G010670	3.77683	5.1241	6.399	3.02285	2.40644
Soltu02G012240	32.6848	28.1914	36.2376	28.3539	28.8147
Soltu02G017340	1.91327	1.80624	1.56764	5.14849	0.865362
Soltu02G017730	9.02396	16.0312	23.5798	12.8452	24.4521
Soltu02G017860	15.831	25.4864	27.5046	32.3023	35.8422
Soltu02G020680	0.291139	0.909912	1.06107	0.258347	0.966803
Soltu02G021990	5.22828	13.9866	18.2578	55.9021	30.2728
Soltu02G028060	0	5.88503	6.65274	6.58922	0.977851
Soltu02G029950	44.3021	49.5034	68.7272	104.08	145.348
Soltu02G033570	0	6.1496	2.19e-07	2.42e-09	3.02289
Soltu02G033830	3.02668	3.80024	6.78022	0.978698	0.593983
Soltu02G034590	25.561	31.9855	22.578	49.0613	36.3881
Soltu03G000550	1.44847	1.98265	1.20134	0.509808	0.405813
Soltu03G002260	4.76105	0	5.71445	2.70493	0
Soltu03G002940	0.42204	0.19243	0.477444	0.196647	1.47835
Soltu03G013630	5.0873	6.18052	4.84509	4.14521	3.35959
Soltu03G025320	18.6733	22.7013	24.0604	55.571	57.9477
Soltu03G029850	9.91793	13.8147	17.1428	8.33082	16.8043
Soltu05G002540	3.15804	8.15744	4.84206	26.4346	2.20786
Soltu05G010500	7.57936	11.0731	4.88239	3.02024	8.93342
Soltu05G012820	16.3233	18.4005	17.1839	25.2371	24.7404
Soltu05G018370	8.14256	11.4899	14.3719	20.7281	24.1782
Soltu05G024060	26.9177	41.4546	34.761	44.8753	27.9969
Soltu06G000690	2.52341	3.7916	5.29352	4.33568	3.53437
Soltu06G001970	4.98316	6.00971	4.7958	1.63496	3.37517
Soltu06G002260	0	0	0	0	0
Soltu06G002270	31.9811	16.4036	26.3736	24.1184	25.0232
Soltu06G009790	1.55023	0	0.364289	4.5001	6.695
Soltu06G023120	6.35737	17.5472	22.3043	36.504	25.1254
Soltu06G034450	3.03299	3.79061	3.08592	3.2302	2.77019
Soltu07G016550	3.64599	7.24834	9.4787	15.5199	7.07088
Soltu07G017360	0.850665	1.70061	2.63291	1.68647	1.57488
Soltu07G017450	0	0	0	0	0
Soltu07G017530	5.37707	5.30446	6.68947	13.2517	16.2675
Soltu07G019810	13.4833	25.8315	34.3717	67.093	60.4745
Soltu07G020040	6.6833	6.16635	0.998795	9.42861	19.3646
Soltu07G024380	79.2202	104.672	148.726	84.1357	78.1808
Soltu08G001290	16.7771	21.6597	27.1743	20.5691	24.6115
Soltu08G008680	0.791852	0	0.774423	1.80424	0
Soltu08G012290	0.911064	1.89452	1.90835	1.32757	0.770425
Soltu09G008070	5.85598	5.67422	4.67145	4.96284	1.68702
Soltu09G017280	0	0	0	0	0
Soltu09G017690	20.3959	28.4372	41.5827	12.5718	5.99828
Soltu09G020590	12.7578	16.4866	14.8856	20.8313	14.8844
Soltu09G020810	3.73189	5.07197	5.63473	5.92205	4.85671
Soltu09G022500	0	0	0	0.0426087	0
Soltu09G022530	0.607482	1.90951	2.83764	1.57314	1.82792
Soltu09G023400	4.88374	9.34103	5.56221	10.0057	23.1792
Soltu09G028850	9.88366	13.1263	18.4081	14.9786	8.76064
Soltu10G002310	23.7496	45.0142	56.7961	27.1373	25.4723
Soltu10G004220	10.7176	20.6201	31.6275	127.237	27.1809
Soltu10G004900	5.86482	12.1987	8.29875	16.1581	34.5858
Soltu10G015680	1.74468	0.411612	0.505268	1.85103	0.80654
Soltu10G018400	8.52575	17.2516	18.3872	28.4189	27.5266
Soltu10G022750	2.74099	5.89697	7.57997	12.5161	12.6549
Soltu10G026870	3.65875	37.1022	35.022	72.7488	38.8898
Soltu10G029050	13.8447	22.8024	27.1241	55.6424	26.1138
Soltu11G001010	0	1.96335	1.07449	0	8.67473
Soltu11G010670	3.44163	9.28092	10.1305	19.0971	16.8819
Soltu11G021190	2.69023	4.52163	2.72586	4.29709	2.58956
Soltu12G009090	12.3902	7.48832	12.1155	11.5817	9.56379
Soltu12G016010	2.87945	4.39821	6.34883	13.1149	8.85632
Soltu12G023350	0.872517	2.90705	0.900441	1.18354	5.94912
Soltu12G028090	0.250679	0	0	0.13105	0.508169
Soltu12G028180	0.662665	0	0.769851	0.789202	15.2036
Soltu12G028210	1.39153	3.44705	2.26269	4.0829	29.1587
Soltu12G028260	0.653188	0.352797	0.248574	0	30.0243
Soltu12G029640	11.153	12.4409	22.8042	18.0764	12.8045
