# Supplementary material for: Comprehensive Characterization of the C3HC4 RING Finger Gene Family in Potato (Solanum tuberosum L.): Insights into Their Involvement in Anthocyanin Biosynthesis
Source: Int J Mol Sci. 2024 Feb 8;25(4):2082. doi: 10.3390/ijms25042082 (PMC10889778; doi:10.3390/ijms25042082)
Supplement: Supplementary file 1 [file ijms-25-02082-s001.zip › Table S8.xlsx]

## Sheet: Sheet1
Table S8 The FPKM value of StRING-HCs in different hormone treatments
Gene ID	Control (IAA; GA3; BAP; ABA, Whole Plant in vitro, Media C)	ABA 24hr, 50uM	IAA 24hr, 10uM	GA3 24hr, 50uM	BAP 24hr, 10uM
Soltu01G001590	22.7958	24.8266	21.686	23.96	15.1646
Soltu01G023560	2.8166	2.66729	2.16383	2.23455	1.23519
Soltu01G027650	4.97752	4.38247	4.74463	5.42039	4.99048
Soltu01G038400	47.0874	35.2264	56.3517	63.4586	66.3767
Soltu01G042890	12.3378	20.1024	12.7939	11.8626	7.75805
Soltu02G000720	16.2455	33.7906	16.7178	21.3951	27.4182
Soltu02G001760	4.04143	2.93459	4.16273	3.60563	2.12757
Soltu02G008910	3.22527	1.9966	3.49674	2.5059	0
Soltu02G010660	4.46691	5.02892	3.65553	3.39766	2.63887
Soltu02G010670	0	0.922832	0	0.86476	0
Soltu02G012240	12.044	18.5975	15.2239	15.5642	22.8188
Soltu02G017340	6.88739	12.5154	8.34988	8.21967	3.37516
Soltu02G017730	5.77617	4.03735	5.06813	6.85957	6.19306
Soltu02G017860	0	0.704155	0.00122395	2.80029	0
Soltu02G020680	0.697972	0.932036	0.479339	0.0828963	0
Soltu02G021990	14.4164	17.3123	13.2578	17.3553	26.1052
Soltu02G028060	13.3977	12.0583	16.2731	16.2366	14.5474
Soltu02G029950	22.4567	18.8903	17.2456	19.8307	24.0239
Soltu02G033570	7.7253	8.3692	7.55709	10.6571	7.428
Soltu02G033830	20.6787	30.1202	19.5822	22.1199	21.5282
Soltu02G034590	52.2664	60.4281	46.4114	45.1684	60.8768
Soltu03G000550	12.2774	12.2198	9.13589	14.0796	12.1998
Soltu03G002260	9.87889	10.4443	9.76176	9.15006	1.41598
Soltu03G002940	1.96165	0.866237	1.8332	1.55841	0.246954
Soltu03G013630	5.45593	11.632	9.15275	8.14515	8.31201
Soltu03G025320	0.502363	0.320329	1.56279	1.88e-05	0.624046
Soltu03G029850	9.73329	9.64871	7.40434	9.67148	5.80058
Soltu05G002540	5.0751	4.71347	4.78833	4.42935	4.44384
Soltu05G010500	118.357	109.496	154.677	160.653	205.242
Soltu05G012820	12.8683	10.8398	9.56885	11.6264	8.40546
Soltu05G018370	20.4386	16.8017	19.2261	20.6097	9.12725
Soltu05G024060	2.33294	1.46616	2.76347	1.81979	3.27261
Soltu06G000690	0	0	0	0	0
Soltu06G001970	0	0	0	0	0
Soltu06G002260	1.79886	1.43111	1.9424	3.34865	1.17558
Soltu06G002270	6.2224	6.92899	4.74712	5.35385	2.22027
Soltu06G009790	9.54557	0	2.70375	5.66845	0
Soltu06G023120	32.3163	24.2378	24.9786	28.9177	27.8928
Soltu06G034450	0.44349	0.496718	0	0.384712	0
Soltu07G016550	0.983633	0.783826	0.842077	1.2133	0.639636
Soltu07G017360	29.1815	35.0385	32.1402	26.8179	20.0313
Soltu07G017450	5.40552	5.20818	4.74502	4.80387	5.91004
Soltu07G017530	4.84343	9.50743	7.09174	10.5459	5.85142
Soltu07G019810	7.56454	2.9973	6.91546	6.56055	8.77421
Soltu07G020040	1.30592	0	0	0.000188517	0
Soltu07G024380	23.9606	30.0148	17.7002	22.6318	2.45e-08
Soltu08G001290	7.46985	4.57989	5.63082	7.87003	5.01479
Soltu08G008680	14.2015	15.8937	12.3908	12.8992	9.82589
Soltu08G012290	10.5964	8.17773	6.72095	6.63014	4.24183
Soltu09G008070	33.6426	24.037	18.7951	36.7444	11.1603
Soltu09G017280	1.18052	1.18251	1.61499	1.23375	0.254483
Soltu09G017690	19.2696	20.9283	18.4042	16.7636	18.6245
Soltu09G020590	17.8819	15.7926	14.4955	15.7841	17.4612
Soltu09G020810	29.3401	32.5231	26.4965	30.4319	22.8994
Soltu09G022500	6.84757	2.87709	6.01636	4.77646	3.5519
Soltu09G022530	29.4829	32.4766	34.7928	39.1754	39.2562
Soltu09G023400	11.9578	12.0376	12.0546	12.1146	10.6269
Soltu09G028850	0.770407	0.230229	0.550885	0.788052	0.274793
Soltu10G002310	5.11026	6.08618	4.37161	4.70787	3.06628
Soltu10G004220	26.0688	27.2375	68.0949	58.0978	73.2145
Soltu10G004900	4.42534	2.6271	3.61291	3.97251	2.38306
Soltu10G015680	0	0.0791574	0	0	0
Soltu10G018400	1.43634	1.64395	1.4467	2.0958	0.937583
Soltu10G022750	1.36317	2.36613	0.71871	1.21714	0
Soltu10G026870	23.3204	29.5532	23.5846	20.1886	22.1167
Soltu10G029050	21.1543	16.4655	13.4948	13.7888	0.323852
Soltu11G001010	4.14725	9.71468	4.6068	4.59363	3.57633
Soltu11G010670	2.11735	0.0993702	5.36e-06	0.020221	1.01205
Soltu11G021190	0	0	0	0	0
Soltu12G009090	0	4.65158	0	0	0.631946
Soltu12G016010	34.8882	32.4911	36.9285	37.4945	29.7112
Soltu12G023350	1.73847	1.1418	1.62481	1.81371	1.00439
Soltu12G028090	3.76178	2.19858	2.80369	5.2352	8.06033
Soltu12G028180	1.18668	6.26503	0.772948	5.91035	0.443022
Soltu12G028210	43.8019	40.1958	46.0528	64.6369	50.7393
Soltu12G028260	4.6721	2.73774	3.27494	3.78686	3.59221
Soltu12G029640	25.7706	26.006	20.9218	22.8534	21.6082
