# Supplementary material for: Comprehensive Characterization of the C3HC4 RING Finger Gene Family in Potato (Solanum tuberosum L.): Insights into Their Involvement in Anthocyanin Biosynthesis
Source: Int J Mol Sci. 2024 Feb 8;25(4):2082. doi: 10.3390/ijms25042082 (PMC10889778; doi:10.3390/ijms25042082)
Supplement: Supplementary file 1 [file ijms-25-02082-s001.zip › Table S9.xlsx]

## Sheet: Sheet1
Table S9 The FPKM value of StRING-HCs under drought stress
Gene ID	A-S1	Q-S1	A-S2	Q-S2	A-S3	Q-S3
Soltu01G001590	11.0395	7.83062	15.6367	9.55013	15.7803	10.1001
Soltu01G023560	12.1055	13.9401	8.78363	9.31117	9.73673	10.1569
Soltu01G027650	29.1732	32.4828	36.6963	27.4397	48.7583	34.9802
Soltu01G038400	3.20348	2.12719	3.00047	2.69477	3.47239	2.82598
Soltu01G042890	17.3442	16.8483	14.5188	14.3501	17.5983	15.2181
Soltu02G000720	8.68841	8.75141	7.65871	7.77049	9.28253	10.1656
Soltu02G001760	4.55233	5.12408	4.0463	3.59484	5.44599	4.90128
Soltu02G008910	6.7519	4.63532	18.0552	13.3318	19.9051	19.5411
Soltu02G010660	0.0588757	0.161232	0.102884	0.173246	0.105888	0.268686
Soltu02G010670	2.62768	2.85124	2.3417	2.57111	3.34329	3.2294
Soltu02G012240	24.0808	20.933	33.8	23.5369	51.4738	34.6489
Soltu02G017340	2.6317	3.11672	2.65089	2.89981	4.79239	3.55402
Soltu02G017730	14.9554	13.8892	9.5533	10.8021	12.1214	12.8929
Soltu02G017860	15.3316	9.58985	13.5775	15.2002	23.227	11.3845
Soltu02G020680	0.0845337	0	0.0250467	0.023705	0	0.045895
Soltu02G021990	10.553	9.70623	15.5183	12.7591	15.5537	11.7921
Soltu02G028060	3.83069	2.42871	0.268989	0.0692203	0.778671	0.192779
Soltu02G029950	12.094	12.4109	10.1906	11.7154	10.2774	13.2546
Soltu02G033570	9.03864	9.56964	9.61754	7.35816	9.50172	7.80832
Soltu02G033830	0.027157	0.246691	0.042936	0.097061	0.143622	0.421264
Soltu02G034590	0.100013	0.222256	0.158555	0.223075	0.139853	0.127351
Soltu03G000550	7.41882	6.65487	9.26796	7.40613	10.5403	8.03526
Soltu03G002260	0.171175	0.215058	0.36792	0.417777	0.864502	2.30281
Soltu03G002940	3.83514	5.25783	4.0042	3.74353	2.65239	1.94655
Soltu03G013630	17.7228	15.8683	15.5191	13.419	16.9279	13.4133
Soltu03G025320	29.5296	33.6656	33.1769	30.7034	33.7718	32.4843
Soltu03G029850	13.5109	14.7449	43.643	52.5776	29.4857	31.9827
Soltu05G002540	23.2749	14.8579	7.34242	6.24002	10.4819	4.16115
Soltu05G010500	9.73395	35.7428	26.7076	72.6845	29.9878	42.697
Soltu05G012820	5.36153	5.77375	5.9249	4.20742	5.64866	4.96994
Soltu05G018370	4.87681	5.21211	4.48505	3.53725	9.53035	4.65089
Soltu05G024060	43.1576	30.533	42.818	37.6244	51.3795	55.2014
Soltu06G000690	4.14438	3.8548	4.91817	4.0383	5.90814	4.8055
Soltu06G001970	1.67217	1.07523	2.4468	1.40034	2.73065	1.6192
Soltu06G002260	0	0	0	0	0	0
Soltu06G002270	8.00536	10.7732	10.6906	11.5371	9.29988	10.4295
Soltu06G009790	3.65098	3.21761	3.29164	2.84069	4.50652	4.12111
Soltu06G023120	14.8151	15.5056	16.1344	16.297	15.0424	14.1886
Soltu06G034450	2.20398	2.05558	1.90455	1.05163	3.72048	2.42825
Soltu07G016550	0.60255	0.619006	0.385962	0.637013	0.578104	0.613773
Soltu07G017360	5.67553	2.93131	7.45418	4.66453	6.10101	5.4986
Soltu07G017450	3.9891	1.62754	4.30094	1.62175	5.03553	2.06915
Soltu07G017530	4.15451	3.76604	7.04284	5.97209	8.57883	6.26765
Soltu07G019810	24.668	13.2285	16.3025	12.1809	24.4768	14.903
Soltu07G020040	0	0.0831983	0	0	0	0
Soltu07G024380	199.347	154.195	156.075	100.914	147.194	117.98
Soltu08G001290	21.3122	23.0887	21.8011	23.6386	29.9492	27.322
Soltu08G008680	0.10718	0.0125967	0	0	0.126456	0
Soltu08G012290	1.68255	2.74149	1.19881	1.72124	2.82813	2.36929
Soltu09G008070	4.23915	5.44083	1.23922	2.06716	2.47518	2.27665
Soltu09G017280	0	0	0	0	0	0
Soltu09G017690	7.59804	10.4943	2.33603	4.47443	3.88381	7.6581
Soltu09G020590	8.02156	5.53733	5.15601	2.81925	6.56624	3.94035
Soltu09G020810	3.64217	3.2581	2.2273	2.06469	3.68494	3.14842
Soltu09G022500	0.084609	0.0537653	0.108936	0	0.493224	0.032187
Soltu09G022530	1.22623	0.967474	1.51216	1.24434	2.1939	1.66373
Soltu09G023400	2.65398	2.81145	2.44821	3.29872	2.32578	2.26606
Soltu09G028850	8.30479	6.72566	6.52256	5.45903	9.81203	6.12401
Soltu10G002310	167.704	149.811	203.446	197.624	153.776	180.029
Soltu10G004220	2.76386	0.546982	0.446964	0.240202	2.27282	0.726511
Soltu10G004900	5.17762	4.89593	5.99091	8.09122	5.80678	5.11659
Soltu10G015680	4.55838	4.56655	4.94412	4.78175	4.47954	5.12167
Soltu10G018400	12.4101	13.4942	16.7356	18.1345	19.5548	21.1871
Soltu10G022750	3.8398	2.28241	3.84072	2.06167	6.61304	3.39665
Soltu10G026870	71.3463	62.5269	81.6917	61.312	73.3731	51.9782
Soltu10G029050	11.6422	8.69278	15.7012	13.5237	22.014	18.0053
Soltu11G001010	13.5811	12.1359	58.3353	73.5935	33.2076	38.4879
Soltu11G010670	8.09602	7.4786	7.6646	6.88304	9.91601	9.53726
Soltu11G021190	1.23583	1.26107	0.629447	0.820838	1.53191	1.18827
Soltu12G009090	7.90827	7.25322	6.05983	5.80503	5.99418	6.50196
Soltu12G016010	2.72823	3.4836	2.00371	2.75132	3.52282	2.97218
Soltu12G023350	5.56324	5.83892	11.31	12.3601	14.3981	12.0706
Soltu12G028090	0.010989	0.117268	0	0	0.03997	0
Soltu12G028180	0	0	0	0.09591	0.192227	0.0538203
Soltu12G028210	0.116826	0.0942317	0.141732	0.150239	0.507347	0.072477
Soltu12G028260	0.0692577	0.0491783	0.0387197	0.040783	0.148549	0.037694
Soltu12G029640	5.1873	10.5708	3.20171	6.96386	2.70953	7.75385
