# Supplementary material for: Comprehensive Characterization of the C3HC4 RING Finger Gene Family in Potato (Solanum tuberosum L.): Insights into Their Involvement in Anthocyanin Biosynthesis
Source: Int J Mol Sci. 2024 Feb 8;25(4):2082. doi: 10.3390/ijms25042082 (PMC10889778; doi:10.3390/ijms25042082)
Supplement: Supplementary file 1 [file ijms-25-02082-s001.zip › Table S10.xlsx]

## Sheet: Sheet1
Table S10 The FPKM value of StRING-HCs in pigmented potato clones
Gene ID	CK-S1	H-S1	R-S1	CK-S2	H-S2	R-S2	CK-S3	H-S3	R-S3
Soltu01G001590	18.3	10.36	12.09	17.33	9.18	20.63	17.71	8.5	17.9
Soltu01G023560	25.85	19.84	16.64	23.37	15.04	24.31	28.25	21.57	30.21
Soltu01G027650	147.43	65.96	33.79	127.61	61.68	160.12	114.51	56.2	70.06
Soltu01G038400	2.13	4.12	5.74	2.11	3.41	3.51	4.14	4.59	4.22
Soltu01G042890	9.1	15.43	10.83	8.85	12.21	13.79	8.42	10.4	8.7
Soltu02G000720	9.44	10.49	11.63	9.64	9.74	7.19	10.46	8.92	7.86
Soltu02G001760	4.44	5.58	4.17	4.78	5.11	5.27	4.02	3.84	4
Soltu02G008910	5.39	41.77	44.8	75.14	40.26	15.23	11.89	9.39	9.59
Soltu02G010660	0.68	0.19	0.88	0.28	0.31	0.14	0.47	0.21	0.08
Soltu02G010670	5.85	7.77	12.64	6.8	6.97	6.3	8.03	6.18	6.61
Soltu02G012240	16.81	30.08	20.92	21.99	22.6	19.11	17.95	17.01	16.79
Soltu02G017340	4.68	5.07	4.35	3.61	4.14	5.5	4.93	3.23	3.98
Soltu02G017730	5.27	14.87	14.22	20.52	10.62	8.87	7.98	6.92	7.82
Soltu02G017860	12.5	29.03	30.73	27.21	17.4	19.74	23.87	21.36	20.26
Soltu02G020680	0	0	0.03	0	0	0	0	0.02	0
Soltu02G021990	23.49	25.46	12.52	18.66	11.83	28.69	16.5	15.83	19.92
Soltu02G028060	0.69	2.18	2.58	1.23	1.35	1.27	1.74	0.71	0.61
Soltu02G029950	33.65	37.71	26.21	26.71	21.9	28.49	37.85	32.23	40.87
Soltu02G033570	6.53	19.88	21.18	15.47	14.1	11.34	7.8	8.58	6.52
Soltu02G033830	0.09	0.54	1.34	0.58	0.87	0.07	0.25	0.13	0
Soltu02G034590	32.05	32.67	20.04	28.12	29.39	30.4	26.05	25.98	19.95
Soltu03G000550	0.06	0.6	0.33	0.31	0.47	0.05	0.05	0.04	0.04
Soltu03G002260	5.19	8.64	12.91	11.09	7.18	8.98	4.73	5.08	4.78
Soltu03G002940	0.15	0.33	0.47	0.91	0.89	0.06	0.18	0.08	0.1
Soltu03G013630	3.25	5.33	8.04	6.98	4.51	5.37	5.47	3.87	3.03
Soltu03G025320	18.67	25.06	33.97	27.91	22.94	27.45	16.89	16.59	21.7
Soltu03G029850	3.01	4.05	4.72	4.19	2.97	3.09	4	3.02	3.55
Soltu05G002540	14.3	14.63	7.35	12.18	9.3	16.47	19.4	13.5	15.54
Soltu05G010500	0.65	3.28	0.99	0.77	1.49	0.66	4.06	2.7	2.42
Soltu05G012820	4.62	14.22	9.52	8.23	10.09	4.94	8.41	9.21	8.54
Soltu05G018370	3.85	4.15	3.45	3.35	3.64	3.46	4.49	3.85	5.55
Soltu05G024060	26.85	19.81	20.36	23.94	15.59	22.57	26.63	15.81	16.96
Soltu06G000690	4.03	3.94	3.7	4.03	4.29	4.35	3.84	3.28	3.58
Soltu06G001970	0.59	2.57	1.52	1	1.4	0.58	0.37	0.23	0.25
Soltu06G002270	13.6	10.78	15.92	17.05	13.3	10.29	11.48	7.95	7.49
Soltu06G009790	5.5	4.82	5.46	3.61	3.86	6.43	5.35	4.82	4.07
Soltu06G023120	9.62	12.2	9.51	13.03	8.41	14.23	12.2	9.35	7.99
Soltu06G034450	0.88	0.88	1.46	1.52	1.69	0.85	1.26	0.86	0.51
Soltu07G016550	24.64	11.72	18.26	23.15	14.35	52.49	22.4	11.7	29.62
Soltu07G017360	3.52	2.27	1.01	2.2	2.15	1.75	3.26	1.25	1.12
Soltu07G017450	0.13	0	2.48	0.51	0	3.14	0.09	0	2.79
Soltu07G017530	42.42	11.73	11.03	27.52	13.39	33.14	17.15	13.04	17.34
Soltu07G019810	52	9.47	21.29	19.56	6.64	32.87	34.2	40.92	57.86
Soltu07G020040	11.18	10.06	12.11	9.79	9	16.52	11.82	12.15	16.84
Soltu07G024380	17.5	29.75	41.1	25.36	23.87	20.01	22.16	23.74	17.99
Soltu08G001290	29.54	25.63	24.9	26.66	33.06	25.87	34	37.04	35.94
Soltu08G008680	0.51	3.31	2.36	1.77	1.75	0.73	0.65	0.22	0.45
Soltu08G012290	0.89	1.68	0.94	0.91	2.01	0.73	0.94	0.92	0.6
Soltu09G008070	2.49	3.22	5.95	3.43	2.97	3.05	2.85	1.31	1.87
Soltu09G017280	0	46.09	28.98	0	34.75	42.99	0	46.13	43.87
Soltu09G017690	2.83	6.48	5.24	4.35	7.12	1.52	1.65	1.6	1.23
Soltu09G020590	17.81	15.96	17.48	14.95	13.43	20.52	20.1	18.22	19.61
Soltu09G020810	2.3	4.07	3.82	3.04	3.38	3.75	1.29	1.88	1.57
Soltu09G022500	0	0.05	0	0	0	0	0.02	0	0
Soltu09G022530	0.21	0.28	0.46	0.13	0.19	0.03	0.14	0.1	0.12
Soltu09G023400	0.16	0.89	2.84	1.14	0.91	1.57	0.24	0.25	0.6
Soltu09G028850	10.01	8.29	8.33	7.45	10.94	6.18	9.21	8.03	6.59
Soltu10G002310	2.28	3.34	2.78	3.12	3.17	1.05	5.22	3.13	0.92
Soltu10G004220	29.63	32.1	28.51	78.72	18.21	6.37	21.18	12.29	6.45
Soltu10G004900	6.74	10.32	8.58	6.45	10.6	8.52	8.39	10.35	8.78
Soltu10G015680	11.55	14.22	14.8	12.64	13.99	10.89	10.39	11.32	9.23
Soltu10G018400	37.07	28.58	23.63	35.53	26.24	38.01	39.71	31.29	33.65
Soltu10G022750	1.07	3.26	1.72	0.78	0.6	1.65	6.26	2.78	7.52
Soltu10G026870	78.3	73.98	45.63	66.16	54.46	91.4	48.37	35.26	42.63
Soltu10G029050	10.43	19.06	13.85	13.32	17.32	14.91	16.54	17.42	20.63
Soltu11G001010	0.01	0.13	0.16	0.64	0.1	0	0.1	0.01	0
Soltu11G010670	13.85	13.95	10.46	11.82	12.69	19.08	9.44	12.97	13.02
Soltu11G021190	0.79	1.41	1.36	1.5	2.09	1.2	0.84	0.44	0.53
Soltu12G009090	8.41	6.71	9.69	7.61	7.12	7.6	10.59	6.36	7.03
Soltu12G016010	4.06	5	3.71	3.98	4.27	5.27	4.37	3.71	3.1
Soltu12G023350	8.4	8.24	4.99	8.71	5.37	11.83	6.95	7.67	10.62
Soltu12G028090	0.02	0.14	0.03	0.08	0	0.05	0	0.02	0
Soltu12G028180	0.24	0.05	0.14	0.11	0.09	0.1	0.42	0	0
Soltu12G028210	0.68	0.34	0.38	0.19	0.27	0.47	0.08	0.58	0.27
Soltu12G028260	0.07	0.17	0.13	0.05	0.15	0.2	0.08	0.56	0.07
Soltu12G029640	8.75	8.73	13.07	11.42	8.64	9.58	11.59	6.08	6.65
