# Supplementary material for: Comprehensive Characterization of the C3HC4 RING Finger Gene Family in Potato (Solanum tuberosum L.): Insights into Their Involvement in Anthocyanin Biosynthesis
Source: Int J Mol Sci. 2024 Feb 8;25(4):2082. doi: 10.3390/ijms25042082 (PMC10889778; doi:10.3390/ijms25042082)
Supplement: Supplementary file 1 [file ijms-25-02082-s001.zip › Table S11.xlsx]

## Sheet: Sheet1
Table S11 The primer of qPCR
Gene name	Forward primer (5'-3')	Reverse Primer(5'-3')
StEF-1α	ATTGGAAACGGATATGCTCCA	TCCTTACCTGAACGCCTGTCA
Soltu09G017280	CCAACACCACCAAAGCCAATTCAAC	GGACATTTACCCTGAGCAGCTATGG
