# Supplementary figures and images for: Comprehensive Characterization of the C3HC4 RING Finger Gene Family in Potato (Solanum tuberosum L.): Insights into Their Involvement in Anthocyanin Biosynthesis
Source: MDPI journal article supplement (doi:10.3390/ijms25042082), 2024-02-08

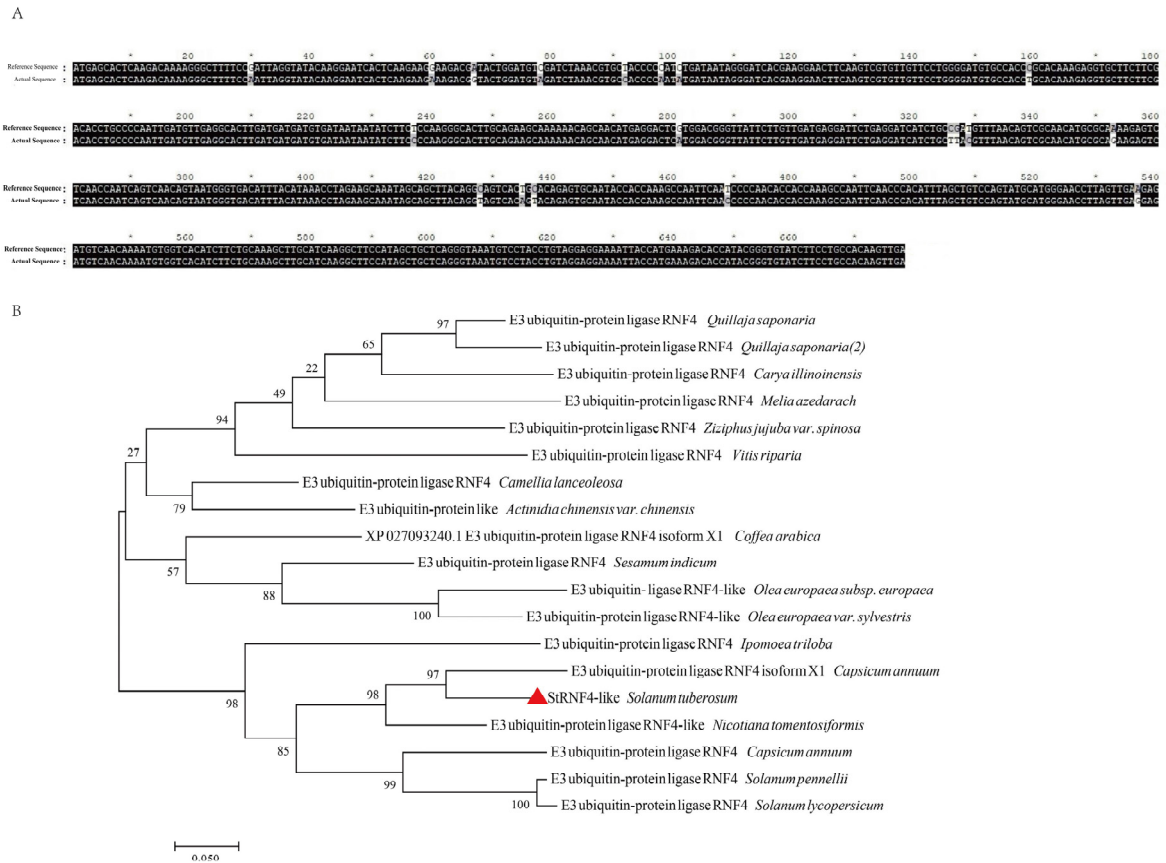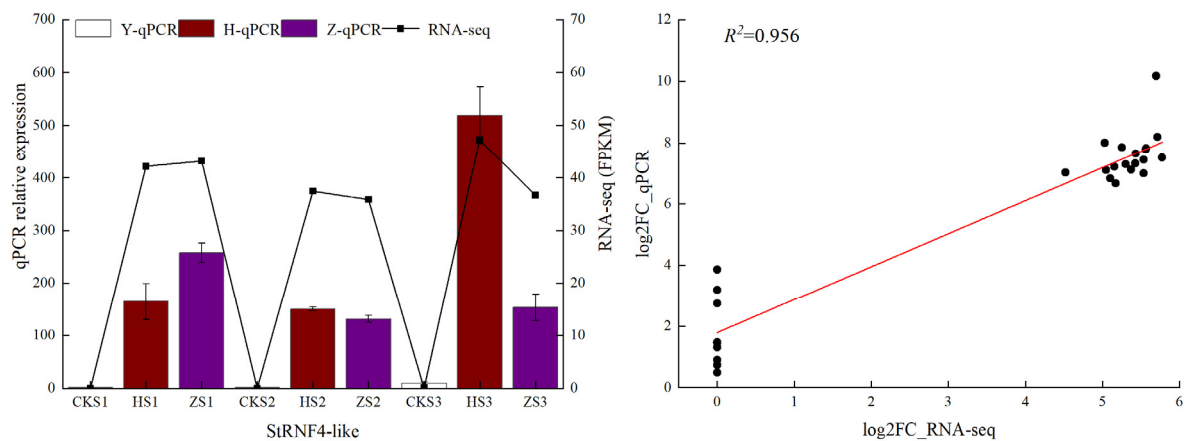

Supplement: s1 [file s1]
